# Supplementary material for: Adoption of a "Urology Surgery Learning Notes" WeChat Platform in Surgical Training for Standardized Urology Residency: A Prospective Comparative Study
Source: Research Square preprint supplement (doi:10.21203/rs.3.rs-7972184/v1), 2025-12-09
Supplement: Supplementary file 1 [file 44d95fb48b02470921394485.docx]

Dear Specialist Training Physicians,

Hello! In order to better understand your experiences and feelings while using the Liu Zhuo Learning Notes for your studies, and to further improve and optimize the learning materials, we are conducting this questionnaire survey. Your feedback is crucial to us and will directly help us enhance teaching quality and learning efficiency. Please complete the following questionnaire carefully and objectively based on your actual situation. Thank you for your support and cooperation!

I. Basic Information

1. Your Name: _________

2. Your Contact Information: _________

3. Your Age: _________

4. Your Gender:

* Male

* Female

5. Your Degree:

* Doctoral Degree

* Master's Degree

6. Your Type of Degree / Educational Background:

* Professional Doctorate

* Academic Doctorate

* Eight-Year Program Doctorate

7. Your Current Training Year:

* Year 1

* Year 2

* Year 3

8. Your Current Professional Title:

* Resident Physician

* Attending Physician

II. Usage Information

1. How did you learn about the "Urological Surgery Learning Notes" teaching resource library? (Multiple choice, select up to 2)

* Hospital internal notification

* Recommendation from colleagues

* Academic conferences

* Online search

* Other (Please specify) __________

2. How frequently do you use this teaching resource library per week?

* Daily

* 3-5 times per week

* 1-2 times per week

* Occasionally use

* Never used it

3. What content do you primarily focus on when using this resource library? (Multiple choice, select up to 2)

* Surgical videos

* Detailed explanation of surgical steps

* Surgical techniques and precautions

* Management of postoperative complications

* Relevant theoretical knowledge

* Other (Please specify) __________

4. Which areas would you prefer to see expanded in this resource library? (Multiple choice)

* Routine surgical treatment for common diseases

* Surgical treatment for complex and difficult diseases

* Surgical strategies for rare diseases

* Management of intraoperative complications in common procedures

* Medication therapy for common diseases (e.g., Benign Prostatic Hyperplasia)

* Medication therapy for urological tumors

* Other (Please specify) __________

5. What format of learning resources do you prefer for learning urological surgery? (Multiple choice, select up to 2)

* Video tutorials

* Detailed illustrated explanations

* Interactive simulation software

* Live surgery demonstrations

* Offline workshops/seminars

* Other (Please specify) __________

6. What content do you primarily focus on when using this resource library? (Multiple choice)

* Laparoscopic surgery

* Endoscopic surgery

* Open surgery

* Minor perineal surgery

* Andrological surgery

* Other (Please specify) __________

7. Which part do you find most beneficial when using this teaching resource? (Multiple choice)

* Detailed breakdown of the surgical procedure

* Preoperative and postoperative considerations

* Prevention and management of surgical complications

* Sharing of surgical techniques and experiences

* Latest surgical technologies and advancements

* Other (Please specify) _________

8. In which aspects do you think this resource has been most helpful for your clinical work? (Multiple choice)

* Improving surgical skills

* Enhancing surgical safety awareness

* Broadening surgical perspectives and approaches

* Deepening understanding of surgical principles

* Improving ability to manage surgical complications

* Other (Please specify) __________

9. When do you usually browse this resource?

* Before preparing for surgery

* After completing surgery

* No specific time constraints

10. How do you rate the difficulty level of the content in this resource?

* Very easy to understand

* Understandable

* Average

* Difficult to understand

* Completely incomprehensible

11. What do you consider to be the advantages of this teaching resource library? (Multiple choice)

* Content is relevant to practical needs

* Quick access to content

* Facilitates fragmented learning

12. What are the main difficulties or problems you have encountered when using this resource library? (Multiple choice)

* Resources are not updated promptly

* Content is not comprehensive enough

* Video quality is poor

* User interface is not friendly

* Lack of interactive and Q&A sessions

* Other (Please specify) __________

13. Do you frequently use mobile devices such as smartphones or tablets to access learning resources? If yes, how would you like the teaching resource library's user experience on mobile devices to be improved?

* Use frequently, hope to optimize the interface layout for smaller screens

* Use frequently, hope to add an offline download feature

* Use occasionally, no specific requirements

* Rarely use

14. Are you willing to recommend this resource to your colleagues?

* Yes

* No

15. Based on your study using the Learning Notes, how helpful do you think they are for achieving the following learning objectives?

| Item | Not at all useful | Basically useless | Uncertain | Somewhat useful | Very useful |
| --- | --- | --- | --- | --- | --- |
| Ultrasonography for Urological Diseases |  |  |  |  |  |
| Urodynamic Studies |  |  |  |  |  |
| Cystostomy |  |  |  |  |  |
| Cystoscopy |  |  |  |  |  |
| Circumcision |  |  |  |  |  |
| Varicocelectomy |  |  |  |  |  |
| Testicular, Epididymal, and Other Scrotal Surgeries |  |  |  |  |  |
| Ureteroscopic Surgery |  |  |  |  |  |
| Transurethral Resection of Bladder Tumor |  |  |  |  |  |
| Transurethral Resection of Prostate |  |  |  |  |  |
| Percutaneous Nephrolithotomy |  |  |  |  |  |
| Laparoscopic Renal Cyst Unroofing |  |  |  |  |  |
| Laparoscopic Partial Adrenalectomy |  |  |  |  |  |
| Laparoscopic Nephrectomy |  |  |  |  |  |
| Laparoscopic Radical Nephrectomy |  |  |  |  |  |
| Laparoscopic Nephroureterectomy |  |  |  |  |  |
| Laparoscopic Partial Nephrectomy |  |  |  |  |  |
| Laparoscopic Pyeloplasty |  |  |  |  |  |
| Laparoscopic Radical Prostatectomy |  |  |  |  |  |
| Laparoscopic Radical Cystectomy |  |  |  |  |  |

III. Satisfaction Survey

|  | Satisfied | Neutral | Dissatisfied |
| --- | --- | --- | --- |
| Teaching content |  |  |  |
| Teaching methods |  |  |  |
| Competency development |  |  |  |

IV. Suggestions for Improvement

In which aspects do you think the "Urological Surgery Learning Notes" new media teaching resource library could be further improved or have content added? (Please describe briefly)

|  |
| --- |

Closing Statement

Thank you for taking the time to complete this questionnaire. Your feedback is a vital driving force for our continuous improvement. We will carefully review your comments and suggestions, and strive to enhance the learning experience and practical value of the "Liu Zhuo Learning Notes" platform to better support your professional development. Wishing you continued success and new achievements in the field of urology
